# Supplementary material for: Impact of Blueberry Consumption on the Human Fecal Bileacidome: A Pilot Study of Bile Acid Modulation by Freeze-Dried Blueberry
Source: MDPI journal article supplement (doi:10.3390/nu14183857), 2022-09-17
Supplement: s1 [file s1]

# **IMPACT OF BLUEBERRY CONSUMPTION ON THE HUMAN FECAL BILEACIDOME: A PILOT STUDY**

William Gagnon, Véronique Garneau, Jocelyn Trottier, Mélanie Verreault, Charles  
Couillard, Denis Roy, André Marette, Jean-Philippe Drouin-Chartier, Marie-Claude  
Vohl and Olivier Barbier

**Supplemental table S1: Comparison of the baseline BA profile in fecal samples  
from male and female volunteers.**

| Bile acids         | Men (n= 11) |          | Women (n=13) |          | Mean Diff. | Adjusted p value |
|--------------------|-------------|----------|--------------|----------|------------|------------------|
|                    | Mean        | SEM      | Mean         | SEM      |            |                  |
| CA                 | 0,1051      | ± 0,0585 | 0,2595       | ± 0,1255 | 0,1544     | >0,999           |
| CDCA               | 0,0595      | ± 0,0267 | 0,1282       | ± 0,0453 | 0,0687     | >0,999           |
| DCA                | 2,6994      | ± 0,5642 | 3,0877       | ± 0,3504 | 0,3883     | >0,999           |
| LCA                | 2,3580      | ± 0,4183 | 2,6709       | ± 0,2440 | 0,3128     | >0,999           |
| HDCA               | 0,0093      | ± 0,0018 | 0,0083       | ± 0,0015 | -0,0010    | >0,999           |
| HCA                | 0,0016      | ± 0,0008 | 0,0029       | ± 0,0011 | 0,0014     | >0,999           |
| UDCA               | 0,0221      | ± 0,0093 | 0,0410       | ± 0,0152 | 0,0189     | >0,999           |
| GCA                | 0,0244      | ± 0,0162 | 0,0087       | ± 0,0030 | -0,0156    | >0,999           |
| GCDCA              | 0,0141      | ± 0,0068 | 0,0070       | ± 0,0013 | -0,0070    | >0,999           |
| GDCA               | 0,0153      | ± 0,0064 | 0,0114       | ± 0,0024 | -0,0039    | >0,999           |
| GLCA               | 0,0003      | ± 0,0001 | 0,0003       | ± 0,0001 | 0,0000     | >0,999           |
| GUDCA              | 0,0014      | ± 0,0005 | 0,0006       | ± 0,0002 | -0,0008    | >0,999           |
| TCA                | 0,0090      | ± 0,0051 | 0,0206       | ± 0,0145 | 0,0116     | >0,999           |
| TCDCA              | 0,0052      | ± 0,0024 | 0,0092       | ± 0,0052 | 0,0040     | >0,999           |
| TDCA               | 0,0124      | ± 0,0062 | 0,0460       | ± 0,0204 | 0,0336     | >0,999           |
| TLCA               | 0,0002      | ± 0,0001 | 0,0026       | ± 0,0012 | 0,0025     | >0,999           |
| TUDCA              | 0,0002      | ± 0,0001 | 0,0010       | ± 0,0007 | 0,0008     | >0,999           |
| TOTAL BA           | 5,4549      | ± 1,0199 | 6,4739       | ± 0,6204 | 1,0190     | >0,999           |
| Unconjugated       | 5,2549      | ± 0,9853 | 6,1985       | ± 0,6111 | 0,9436     | >0,999           |
| Taurine-conjugated | 0,0270      | ± 0,0132 | 0,0794       | ± 0,0402 | 0,0524     | >0,999           |
| Glycine-conjugated | 0,0555      | ± 0,0296 | 0,0281       | ± 0,0062 | -0,0274    | >0,999           |
| Primary            | 0,2172      | ± 0,0901 | 0,4333       | ± 0,1827 | 0,2160     | >0,999           |
| Secondary          | 5,0857      | ± 0,9654 | 5,8189       | ± 0,5461 | 0,7333     | >0,999           |
| 6α-hydroxylated    | 0,0108      | ± 0,0018 | 0,0112       | ± 0,0023 | 0,0004     | >0,999           |
| Total CA           | 0,1385      | ± 0,0668 | 0,2889       | ± 0,1406 | 0,1504     | >0,999           |
| Total CDCA         | 0,0789      | ± 0,0289 | 0,1444       | ± 0,0491 | 0,0655     | >0,999           |
| Total DCA          | 2,7273      | ± 0,5700 | 3,1452       | ± 0,3601 | 0,4179     | >0,999           |
| Total LC           | 2,3587      | ± 0,4185 | 2,6739       | ± 0,2444 | 0,3152     | >0,999           |
| Total HDCA         | 0,0093      | ± 0,0018 | 0,0083       | ± 0,0015 | -0,0010    | >0,999           |
| Total HCA          | 0,0016      | ± 0,0009 | 0,0029       | ± 0,0011 | 0,0013     | >0,999           |

Values are presented as mean concentration (nmol/mg of feces) of the 24 pre- and post-diet samples  $\pm$  SEM (standard error of the mean).

Mean Diff., namely the difference between pre- vs post-treatment were calculated for each of the participants (11 men and 13 women), and values represent the mean $\pm$ SEM.

P values were calculated using Mann-Whitney test than adjusted for multiple comparisons using the Bonferroni-Dunn method. Bile acids composition analysis were performed as detailed in the materials and method section.

CA: cholic acid; CDCA: chenodeoxycholic acid; LCA: lithocholic acid; DCA: deoxycholic acid; HDCA: hyodeoxycholic acid; HCA: hypocholeic acid; UDCA: Ursodeoxycholic acid. G: glyco; T: tauro.

**Supplemental table S2: Comparison of the bile acid profile in fecal samples from male and female volunteers harvested after the 8-week freeze-dried blueberry consumption period.**

| Bile acids              | Men (n= 11) |          | Women (n=13) |          | Mean Diff. | Ajusted p value |
|-------------------------|-------------|----------|--------------|----------|------------|-----------------|
|                         | Mean        | SEM      | Mean         | SEM      |            |                 |
| CA                      | 0,5167      | ± 0,3585 | 0,0671       | ± 0,0242 | -0,4496    | >0.999          |
| CDCA                    | 0,2443      | ± 0,1419 | 0,0325       | ± 0,0102 | -0,2118    | >0.999          |
| DCA                     | 1,8429      | ± 0,3261 | 2,3693       | ± 0,3279 | 0,5265     | >0.999          |
| LCA                     | 1,7667      | ± 0,2542 | 2,1686       | ± 0,1894 | 0,4019     | >0.999          |
| HDCA                    | 0,0056      | ± 0,0008 | 0,0072       | ± 0,0013 | 0,0016     | >0.999          |
| HCA                     | 0,0024      | ± 0,0011 | 0,0014       | ± 0,0005 | -0,0009    | >0.999          |
| UDCA                    | 0,0529      | ± 0,0264 | 0,0508       | ± 0,0286 | -0,0021    | >0.999          |
| GCA                     | 0,0391      | ± 0,0192 | 0,0184       | ± 0,0034 | -0,0207    | >0.999          |
| GCDCA                   | 0,0222      | ± 0,0090 | 0,0127       | ± 0,0023 | -0,0095    | >0.999          |
| GDCA                    | 0,0142      | ± 0,0020 | 0,0147       | ± 0,0029 | 0,0006     | >0.999          |
| GLCA                    | 0,0003      | ± 0,0000 | 0,0003       | ± 0,0001 | 0,0000     | >0.999          |
| GUDCA                   | 0,0021      | ± 0,0006 | 0,0014       | ± 0,0005 | -0,0007    | >0.999          |
| TCA                     | 0,0359      | ± 0,0210 | 0,0087       | ± 0,0019 | -0,0273    | >0.999          |
| TCDCA                   | 0,0350      | ± 0,0202 | 0,0051       | ± 0,0011 | -0,0299    | >0.999          |
| TDCA                    | 0,0191      | ± 0,0115 | 0,0214       | ± 0,0074 | 0,0023     | >0.999          |
| TLCA                    | 0,0006      | ± 0,0003 | 0,0015       | ± 0,0007 | 0,0009     | >0.999          |
| TUDCA                   | 0,0023      | ± 0,0016 | 0,0006       | ± 0,0004 | -0,0017    | >0.999          |
| TOTAL BA                | 4,7414      | ± 0,8047 | 4,9157       | ± 0,5387 | 0,1744     | >0.999          |
| Unconjugated            | 4,4314      | ± 0,8005 | 4,6969       | ± 0,5316 | 0,2655     | >0.999          |
| Taurine-conjugated      | 0,0930      | ± 0,0483 | 0,0374       | ± 0,0109 | -0,0556    | >0.999          |
| Glycine-conjugated      | 0,0778      | ± 0,0291 | 0,0475       | ± 0,0084 | -0,0303    | >0.999          |
| Primary                 | 0,8932      | ± 0,5258 | 0,1445       | ± 0,0403 | -0,7487    | >0.999          |
| Secondary               | 3,6436      | ± 0,5431 | 4,5758       | ± 0,4952 | 0,9322     | >0.999          |
| 6α-hydroxylated         | 0,0080      | ± 0,0011 | 0,0086       | ± 0,0013 | 0,0006     | >0.999          |
| Total CA <sup>9</sup>   | 0,5918      | ± 0,3696 | 0,0942       | ± 0,0281 | -0,4977    | >0.999          |
| Total CDCA <sup>9</sup> | 0,3024      | ± 0,1591 | 0,0503       | ± 0,0125 | -0,2520    | >0.999          |
| Total DCA <sup>9</sup>  | 1,8768      | ± 0,3312 | 2,4055       | ± 0,3322 | 0,5286     | >0.999          |
| Total LCA <sup>9</sup>  | 1,7678      | ± 0,2541 | 2,1704       | ± 0,1895 | 0,4026     | >0.999          |
| Total HDCA <sup>9</sup> | 0,0056      | ± 0,0008 | 0,0072       | ± 0,0013 | 0,0015     | >0.999          |
| Total HCA <sup>9</sup>  | 0,0025      | ± 0,0012 | 0,0014       | ± 0,0005 | -0,0011    | >0.999          |

Values are presented as mean concentration (nmol/mg of feces) of the 24 pre- and post-diet samples  $\pm$  SEM (standard error of the mean).

Mean Diff., namely the difference between pre- vs post-treatment were calculated for each of the participants (11 men and 13 women), and values represent the mean $\pm$ SEM.

P values were calculated using Mann-Whitney test adjusted for multiple comparisons using the Bonferroni-Dunn method. Bile acids composition analysis were performed as detailed in the materials and method section.

CA: cholic acid; CDCA: chenodeoxycholic acid; LCA: lithocholic acid; DCA: deoxycholic acid; HDCA: hyodeoxycholic acid; HCA: hypocholeic acid; UDCA: Ursodeoxycholic acid. G: glyco; T: tauro.
